## ERRATUM

J. G. Lenard, F. Wang, and G. Nadkarni, "The Role of Constitutive Formulation in the Analysis of Hot Rolling," *JOURNAL OF ENGINEERING MATERIALS, AND TECHNOLOGY*, Vol. 109, October 1987, pp. 343-349. There was an error in equation (2) in the above paper. The correct form should be

$$\sigma = Y_0(1 + B\epsilon)^n - A\epsilon^m.$$
